# Supplementary material for: Dual-Specificity Phosphatase 1 (DUSP1) Has a Central Role in Redox Homeostasis and Inflammation in the Mouse Cochlea
Source: MDPI journal article supplement (doi:10.3390/antiox10091351), 2021-08-25
Supplement: s1 [file s1]

| <b>Table S1.</b> Gene sets enriched in <i>Dusp1</i> <sup>-/-</sup> cochlea. |                 |             | <b>20-week-old</b> |                    | <b>32-week-old</b> |                    |
|-----------------------------------------------------------------------------|-----------------|-------------|--------------------|--------------------|--------------------|--------------------|
| <b>Gene set</b>                                                             | <b>Database</b> | <b>Size</b> | <b>NES</b>         | <b>FDR q-Value</b> | <b>NES</b>         | <b>FDR q-Value</b> |
| Immune system                                                               | REACTOME        | 926         | 6.564              | 0.00000            | 4.247              | 0.00000            |
| Gene expression                                                             | REACTOME        | 760         | 6.716              | 0.00000            | 6.037              | 0.00000            |
| Metabolism of proteins                                                      | REACTOME        | 590         | 4.669              | 0.00000            | 6.411              | 0.00000            |
| Cell cycle                                                                  | REACTOME        | 479         | 7.087              | 0.00000            | 6.110              | 0.00000            |
| Pathways in cancer                                                          | KEGG            | 392         | 2.324              | 0.00110            |                    |                    |
| Neuroactive ligand-receptor interaction                                     | KEGG            | 284         | -2.785             | 0.00010            |                    |                    |
| DNA repair                                                                  | REACTOME        | 262         | 4.377              | 0.00000            | 3.810              | 0.00000            |
| Organelle biogenesis and maintenance                                        | REACTOME        | 253         |                    |                    | 3.191              | 0.00000            |
| MAPK signaling pathway                                                      | KEGG            | 251         | -2.327             | 0.00200            |                    |                    |
| Cytokine-cytokine receptor interaction                                      | KEGG            | 250         | 3.905              | 0.00000            | 2.418              | 0.00130            |
| Neuronal system                                                             | REACTOME        | 247         | -7.933             | 0.00000            | -4.097             | 0.00000            |
| RAS signaling pathway                                                       | KEGG            | 226         | -2.351             | 0.00180            |                    |                    |
| Regulation of actin cytoskeleton                                            | KEGG            | 215         |                    |                    | 2.781              | 0.00020            |
| RAP1 signaling pathway                                                      | KEGG            | 214         | -2.603             | 0.00040            | 2.071              | 0.00810            |
| Viral carcinogenesis                                                        | KEGG            | 214         | 3.179              | 0.00000            | 2.201              | 0.00440            |
| Focal adhesion                                                              | KEGG            | 202         | 2.045              | 0.00600            | 2.940              | 0.00020            |

|                                                          |          |     |        |         |        |         |
|----------------------------------------------------------|----------|-----|--------|---------|--------|---------|
| cAMP signaling pathway                                   | KEGG     | 196 | -2.358 | 0.00180 | -2.270 | 0.00890 |
| Chemokine signaling pathway                              | KEGG     | 183 | 3.886  | 0.00000 | 2.645  | 0.00040 |
| Huntington's disease                                     | KEGG     | 180 | 4.688  | 0.00000 | 2.257  | 0.00310 |
| Calcium signaling pathway                                | KEGG     | 179 | -3.159 | 0.00000 |        |         |
| Purine metabolism                                        | KEGG     | 176 | 2.936  | 0.00000 | 3.152  | 0.00000 |
| cGMP-PKG signaling pathway                               | KEGG     | 170 | -2.266 | 0.00280 |        |         |
| Phagosome                                                | KEGG     | 162 | 2.880  | 0.00000 | 3.438  | 0.00000 |
| Alzheimer's disease                                      | KEGG     | 162 | 5.159  | 0.00000 |        |         |
| JAK-STAT signaling pathway                               | KEGG     | 158 | 2.924  | 0.00000 |        |         |
| Oxytocin signaling pathway                               | KEGG     | 157 | -3.948 | 0.00000 |        |         |
| Hippo signaling pathway                                  | KEGG     | 153 | -3.094 | 0.00000 | -2.453 | 0.00400 |
| Cell adhesion molecules                                  | KEGG     | 149 | 2.187  | 0.00280 | 2.646  | 0.00040 |
| Adrenergic signaling in cardiomyocytes                   | KEGG     | 147 | -3.484 | 0.00000 |        |         |
| Non-alcoholic fatty liver disease                        | KEGG     | 146 | 6.713  | 0.00000 |        |         |
| WNT signaling pathway                                    | KEGG     | 141 | -3.061 | 0.00000 |        |         |
| Signaling pathways regulating pluripotency of stem cells | KEGG     | 140 | -2.127 | 0.00580 |        |         |
| Muscle contraction                                       | REACTOME | 137 | -4.823 | 0.00000 | 2.652  | 0.00010 |
| Serotonergic synapse                                     | KEGG     | 131 | -2.332 | 0.00200 |        |         |
| Axon guidance                                            | KEGG     | 128 | -4.674 | 0.00000 | -2.694 | 0.00070 |
| Dopaminergic synapse                                     | KEGG     | 127 | -4.401 | 0.00000 | -2.294 | 0.00810 |
| AMPK signaling pathway                                   | KEGG     | 126 | 2.454  | 0.00060 |        |         |

|                                                      |          |     |        |         |        |         |
|------------------------------------------------------|----------|-----|--------|---------|--------|---------|
| Parkinson's disease                                  | KEGG     | 126 | 5.774  | 0.00000 |        |         |
| Cell cycle                                           | KEGG     | 123 | 3.789  | 0.00000 | 2.884  | 0.00020 |
| Platelet activation                                  | KEGG     | 121 | 3.605  | 0.00000 | 3.371  | 0.00000 |
| Leukocyte transendothelial migration                 | KEGG     | 118 | 3.996  | 0.00000 | 3.949  | 0.00000 |
| Oxidative phosphorylation                            | KEGG     | 118 | 5.759  | 0.00000 |        |         |
| Natural killer cell mediated cytotoxicity            | KEGG     | 115 | 3.672  | 0.00000 |        |         |
| Glutamatergic synapse                                | KEGG     | 113 | -5.436 | 0.00000 | -2.787 | 0.00060 |
| Carbon metabolism                                    | KEGG     | 113 | 5.270  | 0.00000 |        |         |
| Cholinergic synapse                                  | KEGG     | 111 | -4.185 | 0.00000 |        |         |
| Insulin resistance                                   | KEGG     | 110 | 2.675  | 0.00020 |        |         |
| TNF signaling pathway                                | KEGG     | 108 | 3.510  | 0.00000 |        |         |
| T-cell receptor signaling pathway                    | KEGG     | 105 | 2.372  | 0.00080 |        |         |
| DNA replication                                      | REACTOME | 104 | 5.349  | 0.00000 | 4.799  | 0.00000 |
| AGE-RAGE signaling pathway in diabetic complications | KEGG     | 102 | 2.669  | 0.00020 |        |         |
| Pyrimidine metabolism                                | KEGG     | 101 | 3.417  | 0.00000 | 2.571  | 0.00050 |
| Toll-like receptor signaling pathway                 | KEGG     | 101 | 3.150  | 0.00000 |        |         |
| Retrograde endocannabinoid signaling                 | KEGG     | 100 | -4.930 | 0.00000 | -3.065 | 0.00000 |
| Melanogenesis                                        | KEGG     | 99  | -2.907 | 0.00000 |        |         |
| Estrogen signaling pathway                           | KEGG     | 97  | -2.134 | 0.00570 |        |         |
| Circadian entrainment                                | KEGG     | 96  | -4.086 | 0.00000 |        |         |
| Phosphatidylinositol signaling system                | KEGG     | 95  | -3.154 | 0.00000 | -2.865 | 0.00040 |

|                                                 |          |    |        |         |        |         |
|-------------------------------------------------|----------|----|--------|---------|--------|---------|
| Chemical carcinogenesis                         | KEGG     | 92 | 2.165  | 0.00300 | 2.578  | 0.00050 |
| NF- $\kappa$ B signaling pathway                | KEGG     | 91 | 4.271  | 0.00000 |        |         |
| Morphine addiction                              | KEGG     | 90 | -4.032 | 0.00000 | -2.716 | 0.00070 |
| Dilated cardiomyopathy                          | KEGG     | 88 | -2.407 | 0.00140 |        |         |
| GnRH signaling pathway                          | KEGG     | 88 | -2.432 | 0.00130 |        |         |
| Retinol metabolism                              | KEGG     | 88 | 2.529  | 0.00030 |        |         |
| GABAergic synapse                               | KEGG     | 87 | -5.075 | 0.00000 | -2.528 | 0.00260 |
| ErbB signaling pathway                          | KEGG     | 87 | -2.020 | 0.01000 | -2.303 | 0.00800 |
| Programmed cell death                           | REACTOME | 86 | 2.414  | 0.00030 |        |         |
| Fc $\gamma$ R-mediated phagocytosis             | KEGG     | 86 | 2.193  | 0.00280 | 2.157  | 0.00510 |
| Insulin secretion                               | KEGG     | 85 | -3.412 | 0.00000 |        |         |
| Gap junction                                    | KEGG     | 85 | -2.201 | 0.00380 |        |         |
| Steroid hormone biosynthesis                    | KEGG     | 85 | 2.700  | 0.00010 |        |         |
| Aldosterone synthesis and secretion             | KEGG     | 84 | -2.398 | 0.00150 |        |         |
| Hypertrophic cardiomyopathy                     | KEGG     | 84 | -2.448 | 0.00120 | 2.194  | 0.00450 |
| Small cell lung cancer                          | KEGG     | 84 | 2.593  | 0.00020 |        |         |
| Peroxisome                                      | KEGG     | 83 | 3.884  | 0.00000 |        |         |
| Apoptosis                                       | KEGG     | 81 | 3.074  | 0.00000 |        |         |
| Salivary secretion                              | KEGG     | 78 | -2.439 | 0.00130 |        |         |
| Biosynthesis of amino acids                     | KEGG     | 76 | 2.064  | 0.00540 |        |         |
| Arrhythmogenic right ventricular cardiomyopathy | KEGG     | 74 | -2.770 | 0.00010 |        |         |
| Cardiac muscle contraction                      | KEGG     | 74 | 2.007  | 0.00750 |        |         |

|                                       |      |    |        |         |        |         |
|---------------------------------------|------|----|--------|---------|--------|---------|
| Gastric acid secretion                | KEGG | 73 | -2.251 | 0.00300 |        |         |
| Antigen processing and presentation   | KEGG | 73 | 2.808  | 0.00000 | 2.651  | 0.00040 |
| Chronic myeloid leukemia              | KEGG | 73 | 2.152  | 0.00320 |        |         |
| B-cell receptor signaling pathway     | KEGG | 72 | 3.286  | 0.00000 |        |         |
| Adipocytokine signaling pathway       | KEGG | 72 | 2.975  | 0.00000 |        |         |
| Viral myocarditis                     | KEGG | 69 | 2.329  | 0.00100 | 2.187  | 0.00460 |
| Inositol phosphate metabolism         | KEGG | 69 |        |         | -2.704 | 0.00060 |
| RIG-I-like receptor signaling pathway | KEGG | 67 | 2.081  | 0.00490 |        |         |
| P53 signaling pathway                 | KEGG | 67 | 2.979  | 0.00000 |        |         |
| Amphetamine addiction                 | KEGG | 65 | -3.566 | 0.00000 |        |         |
| Renin secretion                       | KEGG | 65 | -2.354 | 0.00180 |        |         |
| Long-term potentiation                | KEGG | 65 | -2.799 | 0.00000 |        |         |
| Glycolysis / gluconeogenesis          | KEGG | 63 | 3.466  | 0.00000 | 2.279  | 0.00280 |
| Cytosolic DNA-sensing pathway         | KEGG | 62 | 2.548  | 0.00020 | 2.366  | 0.00160 |
| Autoimmune thyroid disease            | KEGG | 61 | 2.364  | 0.00080 |        |         |
| Synaptic vesicle cycle                | KEGG | 61 | -2.998 | 0.00000 |        |         |
| Long-term depression                  | KEGG | 60 | -2.322 | 0.00200 |        |         |
| Inflammatory bowel disease            | KEGG | 58 | 3.107  | 0.00000 |        |         |
| Regulation of lipolysis in adipocytes | KEGG | 57 | 2.527  | 0.00030 |        |         |
| Nod-like receptor signaling pathway   | KEGG | 57 | 2.814  | 0.00000 | 2.113  | 0.00630 |
| Acute myeloid leukemia                | KEGG | 57 | 1.982  | 0.00880 |        |         |
| Basal cell carcinoma                  | KEGG | 55 | -2.373 | 0.00170 |        |         |

|                                              |          |    |        |         |        |         |
|----------------------------------------------|----------|----|--------|---------|--------|---------|
| Glutathione metabolism                       | KEGG     | 55 | 2.204  | 0.00260 | 2.606  | 0.00050 |
| Type I diabetes mellitus                     | KEGG     | 53 | 2.154  | 0.00320 | 2.124  | 0.00600 |
| Valine, leucine and isoleucine degradation   | KEGG     | 53 | 3.893  | 0.00000 | -2.387 | 0.00530 |
| HIV-NEF pathway                              | BioCarta | 52 | 3.491  | 0.00000 |        |         |
| Graft-versus-host disease                    | KEGG     | 49 | 3.005  | 0.00000 | 2.259  | 0.00310 |
| Fanconi anemia pathway                       | KEGG     | 48 | 2.487  | 0.00040 | 2.077  | 0.00790 |
| Hedgehog signaling pathway                   | KEGG     | 48 | -2.213 | 0.00350 |        |         |
| PPAR- $\alpha$ pathway                       | BioCarta | 48 | 2.092  | 0.00860 |        | 0.00000 |
| Cocaine addiction                            | KEGG     | 47 | -2.440 | 0.00130 |        |         |
| Allograft rejection                          | KEGG     | 46 | 2.148  | 0.00320 | 2.090  | 0.00730 |
| Proteasome                                   | KEGG     | 45 | 3.265  | 0.00000 | 2.824  | 0.00010 |
| Keratinocyte pathway                         | BioCarta | 43 | 2.338  | 0.00390 |        |         |
| Intestinal immune network for IgA production | KEGG     | 41 | 2.669  | 0.00010 | 2.167  | 0.00470 |
| Porphyrin and chlorophyll metabolism         | KEGG     | 41 | 2.127  | 0.00360 |        |         |
| Nicotine addiction                           | KEGG     | 40 | -4.413 | 0.00000 | -2.767 | 0.00050 |
| Pyruvate metabolism                          | KEGG     | 39 | 3.990  | 0.00000 |        |         |
| Pentose and glucuronate interconversions     | KEGG     | 36 | 2.153  | 0.00320 |        |         |
| DNA replication                              | KEGG     | 35 | 4.448  | 0.00000 | 3.954  | 0.00000 |
| IL-2Rb pathway                               | BioCarta | 34 | 2.592  | 0.00160 |        | 0.00000 |
| GPCR pathway                                 | BioCarta | 33 | -2.626 | 0.00070 |        |         |
| Base excision repair                         | KEGG     | 33 | 2.436  | 0.00060 |        |         |
| Citrate cycle                                | KEGG     | 32 | 4.461  | 0.00000 | -2.372 | 0.00540 |

|                                         |          |    |        |         |       |         |
|-----------------------------------------|----------|----|--------|---------|-------|---------|
| Toll pathway                            | BioCarta | 31 | 2.199  | 0.00450 |       |         |
| IL-1R pathway                           | BioCarta | 31 | 2.319  | 0.00370 |       |         |
| Propanoate metabolism                   | KEGG     | 31 | 4.596  | 0.00000 |       |         |
| Death pathway                           | BioCarta | 30 | 2.695  | 0.00110 |       |         |
| Pentose phosphate pathway               | KEGG     | 30 | 2.857  | 0.00000 |       |         |
| RNA polymerase                          | KEGG     | 29 | 1.981  | 0.00880 |       |         |
| Glyoxylate and dicarboxylate metabolism | KEGG     | 29 | 3.029  | 0.00000 |       |         |
| TNFR1 pathway                           | BioCarta | 28 | 2.232  | 0.00400 |       |         |
| Homologous recombination                | KEGG     | 28 | 3.309  | 0.00000 |       |         |
| Ascorbate and Aldarate metabolism       | KEGG     | 27 | 1.980  | 0.00880 |       |         |
| NKT pathway                             | BioCarta | 27 | 2.532  | 0.00180 |       |         |
| FAS pathway                             | BioCarta | 26 | 2.235  | 0.00410 |       |         |
| Stress pathway                          | BioCarta | 25 | 2.720  | 0.00080 |       |         |
| Asthma                                  | KEGG     | 23 | 2.504  | 0.00040 | 2.203 | 0.00450 |
| PGC1- $\alpha$ pathway                  | BioCarta | 23 | -2.512 | 0.00090 |       | 0.00040 |
| Mismatch repair                         | KEGG     | 22 | 2.264  | 0.00160 | 2.381 | 0.00140 |
| Cell cycle pathway                      | BioCarta | 22 | 2.225  | 0.00390 |       |         |
| NF- $\kappa$ B pathway                  | BioCarta | 22 | 2.578  | 0.00150 |       |         |
| RACCYCD pathway                         | BioCarta | 22 | 2.154  | 0.00580 |       |         |
| G2 pathway                              | BioCarta | 21 | 2.323  | 0.00390 |       |         |
| NOS1 pathway                            | BioCarta | 20 | -3.399 | 0.00000 |       |         |
| Proteasome pathway                      | BioCarta | 20 | 2.308  | 0.00360 | 2.659 | 0.00750 |

|                                 |          |    |       |         |  |
|---------------------------------|----------|----|-------|---------|--|
| Caspase pathway                 | BioCarta | 20 | 3.614 | 0.00000 |  |
| ATR BRCA pathway                | BioCarta | 20 | 2.416 | 0.00350 |  |
| IL-12 pathway                   | BioCarta | 20 | 2.369 | 0.00390 |  |
| Mitochondria pathway            | BioCarta | 19 | 2.853 | 0.00030 |  |
| Chemical pathway                | BioCarta | 19 | 2.300 | 0.00330 |  |
| 2-oxocarboxylic acid metabolism | KEGG     | 19 | 2.283 | 0.00140 |  |
| TNFR2 pathway                   | BioCarta | 18 | 2.090 | 0.00830 |  |
| NK cells pathway                | BioCarta | 18 | 2.175 | 0.00500 |  |
| ATM pathway                     | BioCarta | 17 | 2.291 | 0.00340 |  |
| RELA pathway                    | BioCarta | 16 | 2.099 | 0.00850 |  |
| P53 pathway                     | BioCarta | 15 | 2.278 | 0.00350 |  |
| NO2IL-12 pathway                | BioCarta | 15 | 2.882 | 0.00040 |  |

Normalized enrichment value (NES); False discovery rate (FDR).

**Table S2.** TaqMan probes and primers for RT-qPCR experiments.

| Symbol       | Gene                     | Reference     |
|--------------|--------------------------|---------------|
|              | NLR family Pyrin Domain  |               |
| <i>Nlrp3</i> | Containing 3             | Mm00840904_m1 |
| <i>Kim1</i>  | Kidney injury molecule 1 | Mm00506686_m1 |
| <i>Il18</i>  | Interleukin 18           | Mm00446190_m1 |
| <i>Il10</i>  | Interleukin 10           | Mm00446145_m1 |

  

| Gene         | Forward Primer (5'-3') | Reverse Primer (5'-3')   |
|--------------|------------------------|--------------------------|
| <i>Keap1</i> | ACAGCAGCGTGGAGAGATATGA | CCAATCCTCCGTGTCAACATT    |
| <i>Nqo1</i>  | GGTAGCGGCTCCATGTACTC   | CATCCTTCCAGGATCTGCAT     |
| <i>Sod1</i>  | CCAGTGCAGGACCTCATT     | TTGTTTCTCATGGACCACCA     |
| <i>Sesn2</i> | CGTGGCTCATCACCAAGGA    | CAGCTGTGCTCGCCAGTCT      |
| <i>Cs</i>    | AGGCTACACCGACCCTCAGTT  | ATGGTCACTATGGATGGTGAGGTA |

Primers were designed using Primer Express 3.0 software and the mouse gene sequences available on the Ensembl genome database.
