# Supplementary material for: Dual-Specificity Phosphatase 1 (DUSP1) Has a Central Role in Redox Homeostasis and Inflammation in the Mouse Cochlea
Source: Antioxidants (Basel). 2021 Aug 25;10(9):1351. doi: 10.3390/antiox10091351 (PMC8467085; doi:10.3390/antiox10091351)
Supplement: Supplementary file 1 [file antioxidants-10-01351-s001.zip]

Archive with 4 entries (4 files):
- Figure S1-edited.pdf
- Figure S1-english-changes.pdf
- Tables S1 and S2-edited.pdf
- Tables S1 and S2-english-changes.pdf
